1 **Title:**

2 **eDNA in a bottleneck: obstacles to fish metabarcoding studies in megadiverse freshwater**  
3 **systems**

4  
5 **Authors:**

6 Jake M. Jackman<sup>1</sup>, Chiara Benvenuto<sup>1</sup>, Ilaria Coscia<sup>1</sup>, Cintia Oliveira Carvalho<sup>2</sup>, Jonathan S.  
7 Ready<sup>2</sup>, Jean P. Boubli<sup>1</sup>, William E. Magnusson<sup>3</sup>, Allan D. McDevitt<sup>1\*</sup> and Naiara Guimarães  
8 Sales<sup>1,4\*</sup>

9  
10 **Addresses:**

11 <sup>1</sup>*Environment and Ecosystem Research Centre, School of Science, Engineering and Environment,*  
12 *University of Salford, Salford, M5 4WT, UK*

13 <sup>2</sup>*Centro de Estudos Avançados de Biodiversidade, Instituto de Ciências Biológicas, Universidade*  
14 *Federal do Pará, Belém, Brazil*

15 <sup>3</sup>*Coordenação de Biodiversidade, Instituto Nacional de Pesquisas da Amazônia, Manaus,*  
16 *Amazonas, Brazil*

17 <sup>4</sup>*CESAM - Centre for Environmental and Marine Studies, Departamento de Biologia Animal,*  
18 *Faculdade de Ciências da Universidade de Lisboa, Lisbon, Portugal*

19

20 **\*Corresponding authors:**

21 Naiara Guimarães Sales, [naiarasl@gmail.com](mailto:naiarasl@gmail.com)

22 Allan McDevitt, [a.mcdevitt@salford.ac.uk](mailto:a.mcdevitt@salford.ac.uk)

23

24 **Running title:** Obstacles to eDNA surveys in megadiverse systems

25

26 **Keywords:** Amazon, barcoding gap, freshwater, MiFish, Neotropics, reference database,  
27 taxonomic resolution

28

29 **ABSTRACT**

30 The current capacity of environmental DNA (eDNA) to provide accurate insights into the  
31 biodiversity of megadiverse regions (e.g., the Neotropics) requires further evaluation to ensure its  
32 reliability for long-term monitoring. In this study, we first evaluated the taxonomic resolution  
33 capabilities of a short fragment from the 12S rRNA gene widely used in fish eDNA metabarcoding  
34 studies, and then compared eDNA metabarcoding data from water samples with traditional  
35 sampling using nets. For the taxonomic discriminatory power analysis, we used a specifically  
36 curated reference dataset consisting of 373 sequences from 264 neotropical fish species (including  
37 47 newly generated sequences) to perform a genetic distance-based analysis of the amplicons  
38 targeted by the MiFish primer set. We obtained an optimum delimitation threshold value of 0.5%  
39 due to lowest cumulative errors. The barcoding gap analysis revealed only a 50.38% success rate  
40 in species recovery (133/264), highlighting a poor taxonomic resolution from the targeted  
41 amplicon. To evaluate the empirical performance of this amplicon for biomonitoring, we assessed  
42 fish biodiversity using eDNA metabarcoding from water samples collected from the Amazon  
43 (Adolpho Ducke Forest Reserve and two additional locations outside the Reserve). From a total of  
44 84 identified Molecular Operational Taxonomic Units (MOTUs), only four could be assigned to  
45 species level using a fixed threshold. Measures of  $\alpha$ -diversity analyses within the Reserve showed  
46 similar patterns in each site between the number of MOTUs (eDNA dataset) and species (netting  
47 data) found. However,  $\beta$ -diversity revealed contrasting patterns between the methods. We  
48 therefore suggest that a new approach is needed, underpinned by sound taxonomic knowledge, and  
49 a more thorough evaluation of better molecular identification procedures such as multi-marker  
50 metabarcoding approaches and tailor-made (i.e., order-specific) taxonomic delimitation  
51 thresholds.

## 52 INTRODUCTION

53 The need for advancing our understanding of the world's biodiversity increases in parallel with the  
54 acceleration of anthropogenic impacts on the planet's ecosystems. To implement strategies to  
55 minimise the effects of human impacts, understanding compositions of species assemblages within  
56 ecosystems is paramount (Morris, 2010). This task is particularly difficult when investigating  
57 megadiverse regions of the world such as the Neotropics, which harbour an extremely large  
58 diversity of living organisms. The Amazon basin, for example, is estimated to hold the highest  
59 diversity of freshwater fish found anywhere on the planet (Albert & Reis, 2011). To date, it has  
60 been documented that 2,406 species belonging to 514 genera and 56 families of fish inhabit the  
61 tributaries of the Amazon River, with many more not yet described (Jézequel et al., 2020).  
62 Undoubtedly, this region serves as a biodiversity hotspot, with Amazonian fishes representing  
63 ~15% of all freshwater fish species described worldwide (Jézequel et al., 2020; Leroy et al., 2019).

64 Due to the increase in anthropogenic impacts in Neotropical rivers (e.g., pollution, siltation,  
65 mining and damming), there is a growing danger that this rich biodiversity will be lost before it  
66 can be fully described (Alho, Reis & Aquino, 2015; Agostinho, Thomaz & Gomes, 2005). This  
67 emphasizes the urgency of accurate and rapid biodiversity assessments throughout the region.  
68 Although years of biomonitoring in the Neotropical region have been conducted, inventories of  
69 fish fauna remain incomplete (Frota, Depra, Petenucci & Graça, 2016) demonstrating the need for  
70 improvements in biodiversity assessment methods through a more integrative approach aimed at  
71 circumnavigating traditional sampling limitations.

72 A powerful addition to biodiversity surveying is the application of DNA-based approaches.  
73 The use of environmental DNA (eDNA; i.e., DNA extracted from environmental samples such as  
74 water or soil; Taberlet et al., 2012) for biomonitoring is now widespread, particularly within  
75 freshwater ecosystems (Hering et al., 2018; Senapati et al., 2018). Advances in next-generation  
76 sequencing (NGS) have unlocked the potential use of eDNA metabarcoding for monitoring whole  
77 communities within specific taxonomic groups (e.g., fishes; Miya, Gotoh & Sado, 2020). Recent  
78 studies display its efficiency in different aquatic environments and show how it compares  
79 favourably to, or even outperforms, traditional sampling methods in terms of species detections  
80 (McDevitt et al., 2019; McElroy et al., 2020) and facilitates investigations into patterns of  
81 extirpation, invasive species detection, and dynamics of species richness (Lacoursière-Roussel et  
82 al., 2018; Sales et al., 2021). Despite the increase of eDNA surveys in megadiverse systems,

83 several limiting factors prevent its full application (Cilleros et al., 2019; Doble et al., 2020; Sales  
84 et al., 2021). Although challenges associated with the collection and preservation of samples have  
85 already been addressed (Sales et al., 2019), obstacles in taxonomic assignments remain  
86 understudied.

87 The ability to detect species is reliant on the reference library used to assign retrieved  
88 sequences to species level and on the robustness of the taxonomic resolution of targeted gene  
89 fragments (Sassoubre, Yamahara, Gardner, Block & Boehm, 2016). As outlined by the  
90 International Barcode of Life initiative (Hebert, Cywinska, Ball & Dewaard, 2003), databases  
91 targeting mitochondrial cytochrome oxidase subunit I (COI) are generally more complete than  
92 other gene regions such as the mitochondrial 12S and 16S rRNA genes. However, the COI region  
93 has been shown to be less suitable for eDNA metabarcoding work for vertebrates (due to inflated  
94 detections of non-target organisms), therefore substantiating the need to explore the use of more  
95 suitable gene regions such as 12S and 16S and to expand their respective databases (Collins et al.,  
96 2019; Deagle, Jarman, Coissac, Pompanon & Taberlet, 2014).

97 In this context, a set of universal PCR primers for metabarcoding eDNA from fishes has  
98 been developed targeting a length of around 163-185 bp of the 12S rRNA gene region (MiFish;  
99 Miya et al., 2015). This widely used primer set has been pivotal in describing fish communities on  
100 a truly global scale (Miya, Gotoh & Sado, 2020), and has also provided meaningful information  
101 for species-rich rivers (Ahn et al., 2020). Despite the efforts made by global barcoding initiatives  
102 towards the development of more comprehensive reference databases, in most circumstances these  
103 databases remain far from complete, especially for the currently commonly used 12S  
104 mitochondrial gene region (Doble et al., 2020; Sales et al., 2020; Weigand et al., 2019).  
105 Furthermore, the proportion of species sequenced is lower in species-rich regions, such as the  
106 Neotropics with poorly sampled habitats and taxa. As it stands now, only a limited number of fish  
107 species can be found in DNA databases, hindering the potential of eDNA metabarcoding as a  
108 biomonitoring method in these regions (Cilleros et al., 2019; Sales et al., 2019, 2021).

109 Besides the well-known obstacles posed by incomplete reference databases, the taxonomic  
110 resolution of target amplicons can hinder inferences of species occurrence. For example, the  
111 current fixed general threshold used for species assignment (e.g., > 97% similarity - Sales et al.,  
112 2021; >98% similarity - Marques et al., 2020) assumes the existence of a barcoding gap (i.e.,  
113 presence of a gap between the highest intraspecific and the lowest interspecific variation within

114 the analysed taxonomic group; Meyer & Paulay, 2005). The accuracy of selected markers in  
115 detecting species relies on the separation between the intra and inter-specific divergences, and the  
116 greater the overlap between these variations, the less effective DNA barcoding becomes (Meyer  
117 & Paulay, 2005). In the absence of a barcoding gap, the use of a general threshold may lead to an  
118 inaccurate taxonomic assignment, over splitting some taxa while lumping together others. This  
119 issue is particularly important in highly biodiverse areas, especially where the proportion of  
120 recently diverged species and cryptic species is relatively high. In this regard, Sales et al. (2021)  
121 have highlighted issues of low taxonomic resolution with the widely used 12S MiFish marker,  
122 unable to assign members of the genus *Prochilodus* to the species level. This matter then raises  
123 conservation issues as native species (e.g., *P. hartii*) could be wrongfully assigned to congeneric  
124 invasive species (e.g., *P. argenteus*). eDNA metabarcoding represents a technological leap for  
125 characterizing and assessing biodiversity (Petruniak, Bradley, Kelly & Hanner, 2020), but these  
126 obstacles can represent a bottleneck to its application in highly biodiverse regions (Sales et al.,  
127 2020, 2021).

128 In this study, we aim to assess the use of eDNA metabarcoding as a tool to estimate fish  
129 biodiversity in a megadiverse Neotropical system, by directly comparing it to data obtained by  
130 netting surveys carried out at the same time and sites. We adopted a step by step, integrative  
131 approach using newly generated and existing sequence data from a wide range of neotropical fish  
132 species, eDNA from water samples and netting data. We first performed a genetic distance-based  
133 analysis to investigate the optimum delimitation values based on the 12S MiFish primers, followed  
134 by an assessment of the performance of the delimitation values through a barcoding gap analysis.  
135 We then analysed water samples collected from the Brazilian Amazon and we compared measures  
136 of  $\alpha$ -diversity (species richness) and  $\beta$ -diversity (change in species composition among locations)  
137 generated from eDNA and traditional netting data collected in the same sampling sites.

## 138 METHODS AND MATERIALS

### 139 *Evaluation of taxonomic resolution power of the 12S rRNA fragment*

140 In order to improve taxonomic assignment, 47 fish species (Table S1) were sequenced and  
141 included in a customised reference database for Neotropical fishes. Tissue samples were provided  
142 by the Grupo de Investigação Biológica Integrada (GIBI) tissue collection, located at the  
143 Universidade Federal do Pará (UFPA; Belém, Brazil). Fragments of the mitochondrial 12S rRNA  
144 gene were obtained using PCR (conducted using MiFish primers, following the same protocols  
145 used for eDNA samples described below) and Sanger sequenced. Consensus sequences were  
146 obtained with Geneious v8.1 (Kearse et al., 2012).

147 Several analyses were conducted to verify the taxonomic resolution of 12S rRNA  
148 fragments targeted by the MiFish metabarcoding primers. For this stage of the analysis we created  
149 a combined enhanced dataset comprising 264 neotropical fish species, belonging to eight orders  
150 (Table S2) from existing GenBank and newly sequenced data (373 barcodes in total). Threshold  
151 optimization analysis was conducted using the SPIDER package in R v3.5.1 (R Core Team 2019)  
152 through the *threshOpt* function. This returns the false positive and negative rates of identification  
153 accuracy for different threshold values as well as providing the total cumulative errors (false  
154 positive + false negative). When applying a range of thresholds, this function allows the  
155 optimization of values aiming to minimise the error rates. The default threshold for this function  
156 is set to 0.01 (1%), however, this can be changed using the *threshVal* function, and here were  
157 included values ranging from 0.001 to 0.03 (0.1% to 3%). Using the thresholds generated from the  
158 *threshVal* function, a genetic-based delimitation analysis was performed using K2P genetic  
159 distances (Kimura, 1980). The threshold estimates were applied as the best delimitation values to  
160 estimate species. Milan et al. (2020) suggested threshold values ranging from 0.4% to 0.55% for a  
161 different fragment of the 12S rRNA gene. Currently, no delimitating reference values for the  
162 MiFish 12S marker used here have been published, thus we established distance thresholds, which  
163 were then used within the *threshID* function. The *threshID* function assigns four possible results  
164 for each sequence in the dataset: "correct", "incorrect", "ambiguous", and "no ID". The "correct"  
165 results suggest that all matches within the threshold value of the query are the same species and  
166 "no ID" shows that no matches were found to any individual within the threshold.

167 SPIDER was also used as a means to investigate the presence/absence of the "barcoding gap" by  
168 identifying the furthest intraspecific distance among the same species, using the *maxInDist()*

169 function and the closest non-conspecific using the *nonConDist()* function. The occurrence of no  
170 barcoding gap is represented by a zero or negative distance as a result of the maximum intraspecific  
171 distance being subtracted from the minimum interspecific distance.

172

### 173 ***Study sites and sample collection***

174 The eDNA component of the study was conducted in six different sites located in the Brazilian  
175 Amazon, with four sites inserted inside the Adolpho Ducke Forest Reserve (sites B1-B4; Fig. 1;  
176 Table S3) and two outside (A and C). The Reserve is a designated 100 km<sup>2</sup> area protecting  
177 continuous and non-isolated rainforest established by the National Institute of Amazon Research  
178 (INPA, for a more detailed description see Supp. Information). The Ducke Reserve represents one  
179 of the first sites of the Brazilian Long-Term Ecological Research Program (PELD) and the  
180 Biodiversity Research Program (PPBio), run by the Brazilian Ministry of Science and Technology.  
181 A long-term study by Zuanon et al. (2015) has revealed that the streams of the Ducke Reserve  
182 comprise an estimated 70 species of fish from seven taxonomic orders: Characiformes,  
183 Siluriformes, Gymnotiformes, Perciformes (from which now Cichliformes have been separated),  
184 Cyprinodontiformes, and Synbranchiformes. The most diverse taxonomic order in the reserve is  
185 the Characiformes, comprising six families and 24 species followed by the Siluriformes with seven  
186 families and 17 species, Gymnotiformes with four families and 12 species, Perciformes with two  
187 families and 13 species, Cyprinodontiformes with one family and three species, and  
188 Synbranchiformes with one family and one species.

189 Two main drainage basins have their headwaters near the centre of Ducke Reserve, one on  
190 the western side of the reserve that flows to the black waters of the Rio Negro and one on the  
191 eastern side that flows to the white (sediment laden) waters of the Amazon River. Sampling within  
192 the reserve was carried out on the north-west side, along four tributaries of Acará. Three sites were  
193 on unnamed third-order streams (B1-B3; Fig. 1) and one was on Barro Branco, a second-order  
194 stream (B4; Fig 1). Net sampling and eDNA sampling protocols were both carried out in January  
195 2019. Additionally, for the eDNA analysis, two more sites were sampled opportunistically outside  
196 the Reserve (A and C; Fig. 1), one on Aturiá stream, which is a northern tributary of the Rio Negro  
197 (A; Fig. 1), and the other at "the meeting of the waters" where the black waters from the Rio Negro  
198 and the white waters of the Solimões (upper Amazon) form the Amazon River (C; Fig. 1).

199 For the eDNA metabarcoding, from each of the four streams within Ducke Reserve, three  
200 water replicates were taken from three positions (from the left bank, middle and right bank) along  
201 a transect at 0m, 25m, and 50m using 500 ml water bottles resulting in a total of nine replicates  
202 per stream. Two water-sample replicates were collected at site A and three at site C (no netting  
203 was performed at these sites). At the start of each sampling period, a field blank was collected,  
204 totaling four field blanks overall. Samples were collected prior to the start of the netting sampling  
205 to avoid the risk of contamination. Water samples were manually filtered using a syringe and  
206 Sterivex enclosed filters (0.45µm, Merck Millipore) and kept cool until transport to the UK. In  
207 total, 51 samples were analysed (including 41 water samples, four field blanks, two extraction  
208 blanks, four PCR negative controls, Table S4). The eDNA extraction, amplification of the 12S  
209 rRNA fragment using the MiFish primer set, and library preparation were conducted following the  
210 procedure described in Sales et al. (2021).

211 Netting was conducted in the same four sites in the Reserve (sites B1-B4) straight after  
212 water was collected for eDNA analysis (McDevitt et al., 2019), spanning a range of 50m. Each  
213 stream was sampled following the rapid assessment protocol RAPELD (Magnusson et al., 2005).  
214 Two nets (5 mm mesh size) were placed at the edge of the sampling area to prevent fish accessing  
215 and exiting the study area. An additional net was used to subdivide the full length in segments. A  
216 total of three sub-stretches of ~16 meters each moving upstream were covered. The fishes were  
217 collected with nets and hand sieves (2 mm mesh size) then stored in buckets to allow for individual  
218 identification until they were released back into the stream. Morphological identification of  
219 collected specimens was conducted by CB following Zuanon et al. (2015).

220

### 221 ***Bioinformatic analysis***

222 The bioinformatic analysis was completed using the *OBITools* metabarcoding package (Boyer  
223 et al., 2016), following the protocol described by Sales et al. (2021). *FastQC* was used to assess  
224 the quality of the reads and a length filter (command *obigrep*) was used to select fragments of 140-  
225 190 bp and to remove reads with ambiguous bases. SWARM was then used to compute sequence  
226 differences between aligned pairs of amplicons to delineate MOTUs (Mahé, Rognes, Quince, de  
227 Vargas & Dunthorn, 2014). The taxonomic assignment was conducted using the *ecotag* command,  
228 which works in two phases: initially, it performs a search of the assigned reference database to  
229 locate the sequence with the highest overall similarity to the query sequence; then the similarity



230 value obtained from the first step is set as the threshold for searches of additional sequences, equal  
231 to or lower than that of the threshold value within the assigned database. Stringent filtering steps  
232 were applied to the final dataset to remove Molecular Operational Taxonomic Units  
233 (MOTUs)/reads originating from sequencing errors or contamination to avoid false positives for  
234 the library (Table S3). To reach this target, all non-fish reads were removed from the dataset,  
235 including non-target species (e.g., human and domestic species reads) and MOTUs that were likely  
236 to have been carried over from contamination. To remove putative contaminants, the maximum  
237 number of reads recorded in the controls (field collection, DNA extraction, and PCR blanks) were  
238 removed from all samples. Finally, all MOTUs with <10 reads were removed from the final  
239 dataset. The final taxonomic assignment was conducted according to current fixed general  
240 thresholds: MOTUs were assigned at species level when matching the reference sequence with  
241 >97% similarity as performed in previous studies in the Neotropics (Sales et al., 2020, 2021), at  
242 genus level with 95-97% similarity, at family level with 90-95% similarity, and the highest  
243 taxonomic level of order was attributed to MOTUs with less than 90% similarity matching the  
244 reference sequences.

245

#### 246 ***Data analyses***

247 Given the difficulties of taxonomic assignment without complete reference databases, species  
248 identification was not possible from eDNA metabarcoding data and therefore MOTUs as opposed  
249 to species were used for all subsequent analyses. Replicates were pooled (nine water samples per  
250 site for the Ducke streams, two water samples for Aturiá and three for the Solimões river) before  
251 the following statistical analyses.

252 The MetacodeR package version 0.3.4 (Foster, Sharpton & Grünwald, 2017) was used to  
253 analyse the overall taxonomic diversity of the final eDNA dataset. A heat tree displaying the  
254 overall sample reads was produced to display the patterns of MOTU distribution of the eDNA data  
255 per taxonomic family. To visualise the magnitude of uncertainty of taxonomic assignments, a  
256 schematic phylogenetic tree was adapted from Betancur-R et al. (2017) representing the orders,  
257 families, genera and species detected by eDNA metabarcoding with the respective number of  
258 MOTUs assigned to each taxonomic group.

259 For the analysis of the diversity contained within the eDNA dataset (MOTU richness/ $\alpha$ -  
260 diversity and  $\beta$ -diversity), the data were analysed with a presence/absence approach as suggested

261 by Li et al. (2018). The  $\alpha$ -diversity for the eDNA data (richness) was calculated as the total number  
262 of MOTUs found in each sample site and the  $\beta$ -diversity was obtained by the Jaccard dissimilarity  
263 index using the *vegdist* function in the *vegan* 2.5-2 package (Oksanen et al., 2013). Principal  
264 Coordinates Analysis (PCoA) was then used to investigate the relationship between distance and  
265 sites generated through the *cmdscale* function in the  $\beta$ -diversity matrix. The  $\alpha$ -diversity analysis  
266 for the netting dataset was calculated as the total number of identified species found in each sample  
267 site and the  $\beta$ -diversity analysis was performed using the same method applied to the eDNA  
268 dataset. The results of the separate eDNA and netting  $\beta$ -diversity analyses were then superimposed  
269 to produce a final figure.

270

271

272

273

274

275

276

277

278

279

280

281

282

283

284

285

286

287

288

289

290

291

## 292 RESULTS

### 293 *Evaluation of taxonomic resolution of the 12S rRNA fragment*

294 Analysis of the taxonomic delimitation power of the 12S fragment targeted by the MiFish primers  
295 indicated a high rate of ambiguous identification (13.40% - 23.59%) for values ranging from 1%  
296 to 3%, with higher rates associated with increased threshold values. Optimum threshold analysis  
297 identified 0.1% up to 0.5% as intraspecific values with the lowest number of cumulative errors  
298 (Fig. 2A). Barcoding gap analysis revealed an extensive overlap between intraspecific and  
299 interspecific divergences, and only 133 species out of 264 were successfully recovered due to the  
300 absence of a barcoding gap (Fig. 2B). The overlap between intraspecific and interspecific genetic  
301 distances was particularly evident for species still lacking a full taxonomic description (e.g.,  
302 *Trichomycterus* spp., *Hypostomus* spp. and *Harttia* spp.). Still, high divergence values (>3%) were  
303 also found for several other species including the Amazonian cichlids *Heros severus* (10.31%) and  
304 *Aequidens metae* (8.21%), and the loricariids *Hypostomus affinis* (12.3%), *H. plecostomus* (3.64%)  
305 and *Harttia carvalhoi* (3.57%).

306

### 307 *eDNA data analysis*

308 A total of 4,416,267 reads were obtained after trimming, merging, and length filtering during  
309 bioinformatic analysis (Table S5). Considering only MOTUs belonging to Actinopterygii, a final  
310 dataset containing 3,838,166 reads and 84 MOTUs was used for downstream analyses. A total of  
311 seven different taxonomic orders of fish were identified as a result of the taxonomic assignment:  
312 Characiformes, Cichliformes, Siluriformes, Gobiiformes, Synbranchiformes, Gymnotiformes, and  
313 Cypriniformes (Figs 3 and 4; Table S6). Taxonomic assignment was poor for the 84 recovered  
314 MOTUs; only four were identified to species level with the fixed general threshold, whereas 41  
315 were assigned solely at the family level and 37 could only be attributed to the order level (Fig. 4).  
316 From the MOTUs identified to species level, one is known to occur in the Ducke Reserve (*Hoplias*  
317 *malabaricus*) and two have the genus present in this area (*Aequidens* and *Synbranchus*) and one  
318 has been detected only in the Aturiá (Site A; *Phreatobius* sp.). A MOTU was assigned to *Aequidens*  
319 *metae* (0.976 similarity) and *Aequidens pallidus* has been recorded from the Reserve. Another  
320 MOTU was assigned to *Synbranchus marmoratus* (0.976 similarity) but for the studied area, an as  
321 yet undescribed congeneric species (*Synbranchus* sp.) has been reported. A visualization of the  
322 fish community structure was obtained based on the taxonomic identification at the family level

323 due to the difficulties of species identification. The assemblage structure depicted by the heat tree  
324 (Fig. 4) demonstrated a higher overall MOTU count for Characiformes (especially for the  
325 Anostomidae and Erythrinidae families) and Cichliformes (family Cichlidae). Furthermore, the  
326 heat trees evidenced the fish diversity recovered from eDNA samples due to the occurrence of 16  
327 families among the 84 analysed MOTUs.

328

### 329 *Alpha and beta diversity*

330 The netting dataset revealed 18 different species in total (Figs 5A and 5B) with nine species for  
331 B1, 14 for B2, six for B3, and 11 for B4 (Figs 5B). Species richness for the eDNA data revealed a  
332 total of 32 unique MOTUs for the Ducke Reserve streams and a total of 46 MOTUs across the  
333 Ducke Reserve streams (B1: five MOTUs; B2: 19 MOTUs; B3: eight MOTUs and B4: 14 MOTUs;  
334 Fig. 6A). The eDNA dataset also revealed a total of 55 MOTUs for the Aturiá stream, 50 of which  
335 are unique to this sampling location with five of the MOTUs being shared with the other sampling  
336 locations. Three MOTUs (all of which are unique) were found in the Solimões (upper Amazon)  
337 river (Fig. S1).

338  $\beta$ -diversity patterns inferred from Principal Coordinate Analysis (PCoA) showed a  
339 distinction between the Ducke Reserve streams and Aturiá and Solimões (Fig. S1).  $\beta$ -diversity also  
340 shows a clear distinction between the Aturiá stream and Solimões river. Within the Ducke Reserve,  
341 the four streams shared a total of 16 MOTUs and the  $\beta$ -diversity analysis shows a slightly more  
342 clustered pattern as opposed to the other two sampling locations in which Solimões shares no  
343 MOTUs with any other sampling location and the Aturiá shares only five MOTUs with the streams  
344 of the Ducke Reserve. Using only the sampling locations within the Ducke Reserve also  
345 demonstrated the distinction between the species compositions with considerable ordination  
346 distance between each point (Fig. 6B). Only sampling points B3 and B4 were slightly clustered,  
347 indicating that they share a more similar composition to each other compared to B1 and B2.  
348 Otherwise, large ordination distances separate all sampling locations within the Ducke Reserve.  
349  $\beta$ -diversity analysis using the netting dataset again reveals marked distinctions between species  
350 compositions for all four analysed locations (Fig. 6B). However, in this case locations B1 and B2  
351 showed the most similar compositions obtained through the netting data.  $\beta$ -diversity for the netting  
352 dataset did not show similar patterns compared with that obtained from the eDNA dataset (Fig.  
353 6B).

## 354 **DISCUSSION**

355 Understanding community compositions and species distributions within a target area is a crucial  
356 step to inform conservation management strategies. This requires cost-effective and robust  
357 methods for surveying biodiversity in a timely manner and eDNA metabarcoding has emerged as  
358 a promising method for surveying whole ecosystems (Lacoursière-Roussel et al., 2018; Murienne  
359 et al., 2019; Valdez-Moreno et al., 2019). As the use of genetic approaches to biodiversity  
360 monitoring relies on accurate, precise species identifications, the lack of appropriate taxonomic  
361 resolution and, consequently, detailed reference databases prevents the use of eDNA for  
362 biomonitoring from reaching its full potential. Herein, we demonstrate how the combination of  
363 these factors can significantly hinder the application of eDNA metabarcoding in monitoring fish  
364 communities in a megadiverse Neotropical system.

365 There is a knowledge gap regarding the optimum threshold for taxonomic assignments, as  
366 well as the taxonomic resolution/discriminative power of the gene fragments currently used in  
367 metabarcoding studies, particularly within megadiverse regions (Milan et al., 2020; Servis, Reid,  
368 Timmers, Stergioula & Naro-Maciel, 2020; Sales et al., 2021). Here, by performing a genetic-  
369 distance-threshold analysis, an optimum threshold value of 0.5% was obtained as a result of the  
370 lowest total cumulative errors (Fig. 2A). This value is in agreement with a previous study  
371 evaluating the taxonomic resolution of full length and mini-barcodes targeting the same gene  
372 (Milan et al., 2020, 0.55% for mini-barcodes), but contrasts with the standard threshold values (2-  
373 3%) currently widely applied for fish species delimitation based on various 12S rRNA fragments.  
374 Thresholds around 2% have been used in DNA barcoding studies targeting the mitochondrial COI  
375 region to delimit fish species and this has generally been extrapolated to eDNA surveys. However,  
376 using a fixed threshold (e.g., 2%) as a blanket value for studies in poorly described, species-rich  
377 areas can lead to incorrect conclusions regarding species richness. Consequences of this have been  
378 highlighted by Sales et al. (2018) where 306 fish DNA barcodes from the COI region showed that  
379 over one fifth had a mean intraspecific genetic divergence higher than 2%, flagging numerous  
380 possibilities of potential new MOTUs, cryptic species or errors originating from previous  
381 morphological identification of species.

382 For DNA barcodes to be considered effective and accurate, there should be a separation  
383 between intraspecific and interspecific divergences in the analysed marker, referred to as the  
384 “barcoding gap” (Meyer & Paulay, 2005). Analysis of the combined dataset investigating the

385 presence of a barcoding gap revealed an extensive overlap between intraspecific variation and  
386 interspecific distances, leading to only 50% of species being recovered (Fig. 2B). The occurrence  
387 of no barcoding gap represents high levels of intra- and interspecific divergence within the  
388 analysed dataset. This suggests multiple possibilities: the presence of potential cryptic species (a  
389 common phenomenon for Neotropical fishes; Melo, Ochoa, Vari & Oliveira, 2016; Pugedo, de  
390 Andrade Neto, Pessali, Birindelli & Carvalho, 2016; Sales et al., 2018) errors within the reference  
391 database originating from poor taxonomy of previously identified species (Locatelli, McIntyre,  
392 Therkildsen & Baetscher, 2020); or poor taxonomic resolution of the marker used (Meyer &  
393 Paulay, 2005). Considering the high diversity of freshwater fish species in the Neotropics and  
394 consequently broad variation between intraspecific and interspecific genetic distances, caution  
395 should be taken when using universal cut-off values for species delimitation. As evidenced by the  
396 barcoding gap analysis, we stress that the application of a general threshold is not advisable, and  
397 values should be optimized considering the delimitation power of target fragments and the focal  
398 taxa. In order to achieve a robust taxonomic assignment, a thoughtful choice of primers is required.  
399 Although the 12S MiFish primers have undoubtedly been successfully applied in many studies and  
400 justifiably remain widely used (see Miya et al., 2020), it should be noted that it has been  
401 demonstrated that these primers might not provide an unambiguous identification of closely related  
402 species in some systems (Doble et al., 2020; Sales et al., 2021). Greater species level assignments  
403 can be achieved through the use of more specific primer sets (Doble et al., 2020), and/or by  
404 applying a multi-marker approach, taking into account that different markers/locus may show  
405 distinct taxonomic coverage and divergence ranges (Zhang et al., 2020).

406         Despite using a large dataset (373 sequences from 264 species), the results provided remain  
407 limited due to the lack of complete reference databases for Neotropical fish species. Not only are  
408 a low number of species included but also, most of these are represented by just one sequenced  
409 specimen, hampering sound analyses regarding intraspecific genetic divergence and limiting  
410 further investigations. Another major impediment to the expansion of the reference data is the  
411 prevalence of efforts towards the construction of databases targeting very specific and short  
412 fragments, and more importantly, the lack of effort in making these sequences fully available in  
413 public depositories. For example, for Neotropical fish species, customised reference databases  
414 have been constructed targeting different fragments of the 12S gene (Cilleros et al. 2019; Milan et  
415 al., 2020; Sales et al., 2021) but in some cases only the fragment being analysed for eDNA has

416 been made publicly available, even when a larger fragment of the gene has been sequenced for the  
417 reference database (Cilleros et al., 2019). This study highlights that the expansion of eDNA studies  
418 in megadiverse areas depends on better collaborative efforts focused on building more publicly  
419 available datasets.

420 The eDNA sampling successfully identified seven orders and 17 families of fish (Figs 3  
421 and 4). If we consider the >99.5% threshold for species assignment based on the optimum  
422 threshold analyses presented above, only *Phreatobius* spp. would be assigned to species level.  
423 When considering a fixed general threshold of >97% for species assignment, only four species  
424 could be assigned (Fig. 4; Table S5). Two of these might represent different congeneric species  
425 (i.e., genera *Aequidens* and *Sybranchus*), possibly due to the lack of taxonomic resolution of the  
426 marker used (Yu et al., 2012). The potential for over and underestimations within our eDNA results  
427 is likely. We generated MOTUs using SWARM, aiming for an estimate of the overall biodiversity.  
428 While many MOTUs correspond to true biological species, some might be the result of PCR or  
429 sequencing errors, unidentified because of an incomplete reference database (Marques et al.,  
430 2019). The ambiguous identification values obtained (85-100%) may result in both the  
431 overestimation of true diversity (Reeder & Knight, 2009; Morgan et al., 2013) while bioinformatic  
432 clustering may have pooled closely related species, underestimating their number within certain  
433 taxonomic groups (Huse, Welch, Morrison & Sogin, 2010). This significantly hinders the  
434 information that we can draw from the eDNA dataset. Therefore, we used the information up to  
435 family level to depict the overall diversity detected in the eDNA data in which ecological  
436 inferences can be made. Despite underperforming eDNA accuracy regarding species  
437 identification, we could still draw important ecological information from the dataset. The high  
438 number of Characiformes MOTUs per site falls in line with previous studies in this region  
439 (Birindelli, Britski & Ramirez, 2020; Sales et al., 2021).

440 Species richness analysis of the eDNA and netting dataset within the Ducke Reserve  
441 reveals a similar pattern (Fig. 6A). Although sampling using eDNA detected slightly more MOTUs  
442 than species detected through the netting survey, it can be assumed that the 32 unique MOTUs  
443 obtained from the eDNA data might represent an overestimation of true diversity obtained (as  
444 outlined above). Species richness estimates obtained from netting surveys (Fig. 5) are reliable (but  
445 not infallible), given that each individual is assigned to a species with high confidence based on  
446 its morphological features (except for cryptic species). Nevertheless, while netting surveys

447 produce accurate data, they cannot be applied to the required spatial scale in Neotropical basins.  
448 Furthermore, their success and reliability depend on the ability/expertise of the surveyor (labour  
449 intensive), the accessibility of the target area (challenging environments), and selectivity based on  
450 the deployed techniques' ability to capture target species. Yet, when optimal conditions are met  
451 (complete reference database, and appropriate markers to name a few), eDNA will outperform  
452 traditional sampling, for its ability to detect species that are missed by the fishing gear deployed.  
453 In this study, the order Synbranchiformes, known to occur in the sampled area (Zuanon et al.,  
454 2015), was detected through eDNA, but not netting conducted at the same time. This species has  
455 been previously identified in the studied area and this highlights the randomness of net sampling,  
456 which could be due to the limited spatial and temporal scales covered by the netting survey, or, in  
457 this case, even by species behaviour. *Synbranchus* are nocturnal fish and can even survive buried  
458 up to three months, hence they can easily elude netting (Prestes-Carneiro & Béarez, 2017).

459  $\beta$ -diversity analysis for both eDNA and traditional methods yielded contrasting patterns.  
460 While eDNA data showed similarities in compositions in the Ducke Reserve streams with slight  
461 clustering of sites B1 and B2, netting data suggest major differences between each sampling  
462 location (Fig. 6B). Barriers that hinder traditional surveying stemming from species size (affecting  
463 susceptibility of capture) and behavioural traits (i.e. shoaling/solitary, fast/slow, exposed/hidden)  
464 can be bypassed when analysing biodiversity on a genetic level (Evans, Shirey, Wieringa, Mahon  
465 & Lamberti, 2017). When utilising traditional methods, particularly in understudied areas, these  
466 barriers can create a bias towards species that are easier to capture, producing species-selective  
467 results (Holubová, Čech, Vašek & Peterka, 2019). A barrier that poses a great hindrance to  
468 biodiversity monitoring, and that is shared by both methods, is the presence of cryptic species  
469 (Beng & Corlett, 2020). Discerning between cryptic species may be difficult when species are  
470 morphologically similar and may result in the incorrect identification of a specimen. However,  
471 despite MOTUs being used as a proxy for species, and showing a positive correlation when used  
472 for taking ecological measures (e.g.,  $\beta$ -diversity, Marques et al., 2019; Sales et al., 2021), results  
473 from the eDNA dataset should be used with caution as highlighted above. Therefore, prior to using  
474 these measures, eDNA metabarcoding and netting surveys merits further investigation in this  
475 Reserve.

476 Although eDNA metabarcoding potentially offers a means to assess biodiversity on a  
477 larger, more time-efficient scale, ensuring accuracy in results is critical. Evidently, eDNA



478 metabarcoding as a biomonitoring tool in the Neotropical region is in its infancy, highlighted by  
479 the lack of appropriate reference databases. Herein, we argue that the commonly adopted threshold  
480 of >97% to assign MOTUs to species level is not optimal in megadiverse, understudied regions  
481 due to the likelihood of false positive or negative assignments. While this study shows that limited,  
482 albeit reliable, ecological inferences of biodiversity can be made with eDNA metabarcoding in  
483 this region (based on MOTU richness for example), it also highlights the need for significant  
484 investment in research aimed at improving availability of reference databases. We advocate for  
485 more transparency and collaboration within the research community, and recommend moving  
486 towards building whole mitochondrial genomes of specimens/species to identify multiple/other  
487 mini-barcodes and investigate order-specific taxonomic delimitation thresholds for future eDNA  
488 metabarcoding surveys of fishes and other vertebrates in the Neotropics (Milan et al., 2020; Sales  
489 et al., 2020, 2021).

490

491

492

493

494

495

496

497

498

499

500

501

502

503

504

505

506

507

508

509 **ACKNOWLEDGMENTS**

510 The present study was carried out with all required permits (ICMBIO N. 54795-2, DEFRA  
511 126191/385550/0). This project was partially funded by a University of Salford Internal Research  
512 Award awarded to CB, ADM, and IC. We are grateful to Rafael Estrela, Andrew Highlands and  
513 the undergraduate students of the University of Salford for assistance during fieldwork, Joseph  
514 Perkins for assistance during laboratory work and Sam Browett for help with bioinformatics. NGS  
515 also thanks FCT/MCTES for the financial support to CESAM (UID/AMB/50017/2019), through  
516 national funds. JSR and COC thank CNPq and the Biodiversity Research Consortium Brazil-  
517 Norway (BRC 16/19), for financial support through a PhD scholarship for COC and for  
518 consumable costs for sequencing. We also thank Guilherme Oliveira at the Instituto Tecnológico  
519 Vale, Belém, for laboratory access. The Ducke Reserve permanent stream plots are maintained by  
520 PELD-IAFA, PPBio-AmOC and INCT-CENBAM, all financed by the Ministry of Science,  
521 Technology and Innovation (MCTI) through CNPq and the Fundação de Amparo à Pesquisa do  
522 Estado de Amazonas (FAPEAM).

523

524 **AUTHOR CONTRIBUTIONS**

525 NGS, ADM, CB and IC conceived, designed and acquired funding for the study. CB carried out  
526 the eDNA sampling and netting surveys. NGS performed the eDNA-based laboratory work and  
527 COC and JSR performed the species barcoding. NGS and JMJ carried out the bioinformatic  
528 analyses. JMJ, NGS, CB, IC and ADM analysed the data. JMJ, NGS and ADM wrote the  
529 manuscript, with all authors contributing to editing and discussions.

530

531 **DECLARATION OF COMPETING INTEREST**

532 The authors declare that they have no known personal relationships or competing financial  
533 interests that could have influenced the work conducted in this study.

## 534 REFERENCES

- 535 Agostinho A.A., Thomaz S.M., Gomes L.C. (2005). Conservação da biodiversidade em águas  
536 continentais do Brasil. *Megadiversidade* 1, 70–78.
- 537 Ahn H., Kume M., Terashima Y., Ye F., Kameyama S., Miya M., Kasai A. (2020). Evaluation of  
538 fish biodiversity in estuaries using environmental DNA metabarcoding. *PLoS One*, 15(10), e0231127.
- 539 Albert J.S., Reis R. (2011). *Historical biogeography of Neotropical freshwater fishes*. University  
540 of California Press.
- 541 Alho C.J., Reis R.E., Aquino P.P. (2015). Amazonian freshwater habitats experiencing  
542 environmental and socioeconomic threats affecting subsistence fisheries. *Ambio*, 44(5), 412-425.
- 543 Beng K.C., Corlett R.T. (2020). Applications of environmental DNA (eDNA) in ecology and  
544 conservation: opportunities, challenges and prospects. *Biodiversity and Conservation*, 29, 2089-2121.
- 545 Betancur-R R., Wiley E.O., Arratia G., Acero A., Bailly N., Miya M., Orti G. (2017). Phylogenetic  
546 classification of bony fishes. *BMC Evolutionary Biology*, 17, 162.
- 547 Birindelli J.L., Britski H.A., Ramirez J.L. (2020). A new endangered species of *Megaleporinus*  
548 (Characiformes: Anostomidae) from the Rio de Contas basin, eastern Brazil. *Journal of Fish Biology*, 96(6),  
549 1349-1353.
- 550 Boyer F., Mercier C., Bonin A., Le Bras Y., Taberlet P., Coissac E. (2016). obitools: A unix-  
551 inspired software package for DNA metabarcoding. *Molecular Ecology Resources*, 16(1), 176-182.
- 552 Cilleros K., Valentini A., Allard L., Dejean T., Etienne R., Grenouillet G., Iribar A., Taberlet P.,  
553 Vigouroux, R., Brosse S. (2019). Unlocking biodiversity and conservation studies in high-diversity  
554 environments using environmental DNA (eDNA): A test with Guianese freshwater fishes. *Molecular*  
555 *Ecology Resources*, 19(1), 27-46.
- 556 Collins R.A., Bakker J., Wangenstein O.S., Soto A.Z., Corrigan L., Sims D.W., Genner M.J.,  
557 Mariani S. (2019). Non-specific amplification compromises environmental DNA metabarcoding with COI.  
558 *Methods in Ecology and Evolution*, 10(11), 1985-2001.
- 559 Deagle B.E., Jarman S.N., Coissac E., Pompanon F., Taberlet P. (2014). DNA metabarcoding and  
560 the cytochrome c oxidase subunit I marker: not a perfect match. *Biology Letters*, 10(9), 20140562.
- 561 Doble C.J., Hipperson H., Salzburger W., Horsburgh G.J., Mwita C., Murrell D.J., Day J.J. (2020).  
562 Testing the performance of environmental DNA metabarcoding for surveying highly diverse tropical fish  
563 communities: A case study from Lake Tanganyika. *Environmental DNA*, 2(1), 24-41.
- 564 Evans N.T., Shirey P.D., Wieringa J.G., Mahon A.R., Lamberti G.A. (2017). Comparative cost and  
565 effort of fish distribution detection via environmental DNA analysis and electrofishing. *Fisheries*, 42(2),  
566 90-99.

- 567 Foster Z.S., Sharpton T.J., Grünwald N.J. (2017) Metacoder: an R package for visualization and  
568 manipulation of community taxonomic diversity data. *PLoS Computational Biology*, 13, e1005404.
- 569 Frota A., Depra G.D.C., Petenucci L.M., Graça W.J.D. (2016). Inventory of the fish fauna from  
570 Ivaí River basin, Paraná State, Brazil. *Biota Neotropica*, 16(3), e20150151.
- 571 Hebert P.D., Cywinska A., Ball S.L., Dewaard J.R. (2003). Biological identifications through DNA  
572 barcodes. *Proceedings of the Royal Society of London. Series B: Biological Sciences*, 270, 313-321.
- 573 Hering D., Borja A., Jones J.I., Pont D., Boets P., Bouchez A., Kelly M. (2018). Implementation  
574 options for DNA-based identification into ecological status assessment under the European Water  
575 Framework Directive. *Water Research*, 138, 192– 205.
- 576 Holubová M., Čech M., Vašek M., Peterka J. (2019). On the use of a visual census in surveying  
577 fish communities in lentic water bodies. *Ecological Indicators*, 105, 1-5.
- 578 Huse S.M., Welch D.M., Morrison H.G., Sogin M.L. (2010). Ironing out the wrinkles in the rare  
579 biosphere through improved OTU clustering. *Environmental Microbiology*, 12(7), 1889–1898.
- 580 Jézéquel C., Tedesco P.A., Bigorne R., Maldonado-Ocampo J.A., Ortega H., Hidalgo M., Martens  
581 K., Torrente-Vilara G., Zuanon J., Acosta A., Agudelo E. (2020). A database of freshwater fish species of  
582 the Amazon Basin. *Scientific data*, 7, 96..
- 583 Kearse M., Moir R., Wilson A., Stones-Havas S., Cheung M., Sturrock S., Thierer T. (2012).  
584 Geneious Basic: an integrated and extendable desktop software platform for the organization and analysis  
585 of sequence data. *Bioinformatics*, 28(12), 1647-1649.
- 586 Kimura, M. (1980). A simple method for estimating evolutionary rates of base substitutions through  
587 comparative studies of nucleotide sequences. *Journal of Molecular Evolution*, 16(2), 111-120.
- 588 Kubečka J., Godø O.R., Hickley P., Prchalová M., Říha M., Rudstam L., Welcomme R. (2012).  
589 Fish sampling with active methods. *Fisheries Research*, 123-124, 1-3.
- 590 Lacoursière-Roussel A., Howland K., Normandeau E., Grey E.K., Archambault P., Deiner K.,  
591 Lodge D.M., Hernandez C., Leduc N., Bernatchez, L. (2018). eDNA metabarcoding as a new surveillance  
592 approach for coastal Arctic biodiversity. *Ecology and Evolution*, 8(16), 7763-7777.
- 593 Leroy B., Dias M.S., Giraud E., Hugueny B., Jézéquel C., Leprieur F., Tedesco P.A. (2019). Global  
594 biogeographical regions of freshwater fish species. *Journal of Biogeography*, 46(11), 2407-2419.
- 595 Li Y., Evans N.T., Renshaw M.A., Jerde C.L., Olds B.P., Shogren A.J., Pfrender M.E. (2018).  
596 Estimating fish alpha-and beta-diversity along a small stream with environmental DNA metabarcoding.  
597 *Metabarcoding and Metagenomics*, 2, e24262.
- 598 Locatelli N.S., McIntyre P.B., Therkildsen N.O., Baetscher D.S. (2020). GenBank’s reliability is  
599 uncertain for biodiversity researchers seeking species-level assignment for eDNA. *Proceedings of the*  
600 *National Academy of Sciences USA*, 117(51), 32211-32212.

601 Magnusson W.E., Lima A.P., Luizão R., Luizão F., Costa F.R., Castilho C.V.D., Kinupp V.F.  
602 (2005). RAPELD: a modification of the Gentry method for biodiversity surveys in long-term ecological  
603 research sites. *Biota Neotropica*, 5(2), 19-24.

604 Mahé F., Rognes T., Quince C., de Vargas C., Dunthorn M. (2014). Swarm: robust and fast  
605 clustering method for amplicon-based studies. *PeerJ*, 2, e593.

606 Marques V., Guérin P.É., Rocle M., Valentini A., Manel S., Mouillot D., Dejean T. (2020). Blind  
607 assessment of vertebrate taxonomic diversity across spatial scales by clustering environmental DNA  
608 metabarcoding sequences. *Ecography*, 43(12), 1779-1790.

609 McDevitt A.D., Sales N.G., Browett S.S., Sparnenn A.O., Mariani S., Wangensteen O.S.,  
610 Benvenuto C. (2019). Environmental DNA metabarcoding as an effective and rapid tool for fish monitoring  
611 in canals. *Journal of Fish Biology*, 95(2), 679-682.

612 McElroy M.E., Dressler T.L., Titcomb G.C., Wilson E.A., Deiner K., Dudley T.L., Lamberti G.A.  
613 (2020). Calibrating environmental DNA metabarcoding to conventional surveys for measuring fish species  
614 richness. *Frontiers in Ecology and Evolution*, 8, 276.

615 Melo B.F., Ochoa L.E., Vari R.P., Oliveira C. (2016). Cryptic species in the Neotropical fish genus  
616 *Curimatopsis* (Teleostei, Characiformes). *Zoologica Scripta*, 45(6), 650-658.

617 Meyer C.P., Paulay G. (2005). DNA barcoding: error rates based on comprehensive sampling.  
618 *PLoS Biology*, 3(12), e422.

619 Milan D., Mendes I., Damasceno J., Teixeira D., Sales N., Carvalho D. (2020). New 12S  
620 metabarcoding primers for enhanced Neotropical freshwater fish biodiversity assessment. *Scientific*  
621 *Reports* 10, 17966.

622 Miya M., Gotoh R.O., Sado T. (2020). MiFish metabarcoding: a high-throughput approach for  
623 simultaneous detection of multiple fish species from environmental DNA and other samples. *Fisheries*  
624 *Science*, 86, 939-970.

625 Miya M., Sato Y., Fukunaga T., Sado T., Poulsen J.Y., Sato K., Minamoto T., Yamamoto S.,  
626 Yamanaka H., Araki H., Kondoh M. (2015). MiFish, a set of universal PCR primers for metabarcoding  
627 environmental DNA from fishes: detection of more than 230 subtropical marine species. *Royal Society*  
628 *Open Science*, 2(7), 150088.

629 Morgan M.J., Chariton A.A., Hartley D.M., Hardy C.M. (2013). Improved inference of taxonomic  
630 richness from environmental DNA. *PLoS One*, 8(8), e71974.

631 Morris R.J. (2010). Anthropogenic impacts on tropical forest biodiversity: a network structure and  
632 ecosystem functioning perspective. *Philosophical Transactions of the Royal Society B: Biological Sciences*,  
633 365(1558), 3709-3718.

- 634 Murienne J., Cantera I., Cerdan A., Cilleros K., Decotte J.B., Dejean T., Brosse S. (2019). Aquatic  
635 eDNA for monitoring French Guiana biodiversity. *Biodiversity Data Journal*, 7, e37518.
- 636 Oksanen J., Blanchet F.G., Kindt R., Legendre P., Minchin P.R., O'hara R.B., Oksanen M.J.  
637 (2013). Package 'vegan'. *Community ecology package*, version, 2(9), 1-295.
- 638 Petruniak J., Bradley D., Kelly J.M., Hanner R.H. (2020). Commentary: integrating environmental  
639 DNA into applied ecological practice. *Journal of Environmental Studies and Sciences*. doi:  
640 10.1007/s13412-020-00638-1.
- 641 Prestes-Carneiro G., Béarez P. (2017). Swamp-eel (*Synbranchus* spp.) fishing in Amazonia from  
642 pre-Columbian to present times. *Journal of Ethnobiology*, 37(3), 380-397.
- 643 Puggedo M.L., de Andrade Neto F.R., Pessali T.C., Birindelli J.L.O., Carvalho D.C. (2016).  
644 Integrative taxonomy supports new candidate fish species in a poorly studied neotropical region: the  
645 Jequitinhonha River Basin. *Genetica*, 144, 341-349.
- 646 Reeder J., Knight R. (2009). The 'rare biosphere': A reality check. *Nature Methods*, 6(9), 636–637.
- 647 Sales N.G., Kaizer M.D.C., Coscia I., Perkins J.C., Highlands A., Boubli J.P., Magnusson W.E.,  
648 Da Silva M.N.F., Benvenuto C., McDevitt A.D. (2020). Assessing the potential of environmental DNA  
649 metabarcoding for monitoring Neotropical mammals: a case study in the Amazon and Atlantic Forest,  
650 Brazil. *Mammal Review*, 50(3), 221-225.
- 651 Sales N.G., Wangensteen O.S., Carvalho D.C., Mariani S. (2019). Influence of preservation  
652 methods, sample medium and sampling time on eDNA recovery in a neotropical river. *Environmental*  
653 *DNA*, 1(2), 119-130.
- 654 Sales N.G., Wangensteen O., Carvalho D.C., Deiner K., Praebel K., Coscia I., McDevitt A.D.,  
655 Mariani S. (2021). Space-time dynamics in monitoring neotropical fish communities using eDNA  
656 metabarcoding. *Science of the Total Environment*, 754, 142096.
- 657 Sales N.G., Mariani S., Salvador G.N., Pessali T.C., Carvalho D.C. (2018). Hidden diversity  
658 hampers conservation efforts in a highly impacted Neotropical river system. *Frontiers in Genetics*, 9, 271.
- 659 Sassoubre L.M., Yamahara K.M., Gardner L.D., Block B.A., Boehm A.B. (2016). Quantification  
660 of environmental DNA (eDNA) shedding and decay rates for three marine fish. *Environmental Science &*  
661 *Technology*, 50(19), 10456-10464.
- 662 Senapati D., Bhattacharya M., Kar A., Chini D.S., Das B.K., Patra B.C. (2018). Environmental  
663 DNA (eDNA): A promising biological survey tool for aquatic species detection. *Proceedings of the*  
664 *Zoological Society*, 72, 211– 228.
- 665 Servis J.A., Reid B.N., Timmers M.A., Stergioula V., Naro-Maciel E. (2020). Characterizing coral  
666 reef biodiversity: genetic species delimitation in brachyuran crabs of Palmyra Atoll, Central Pacific.  
667 *Mitochondrial DNA Part A*, 31(5), 178-189.

668           Taberlet P., Coissac E., Pompanon F., Brochmann C., Willerslev E. (2012). Towards next-  
669 generation biodiversity assessment using DNA metabarcoding. *Molecular Ecology*, 21(8), 2045– 2050.

670           Valdez-Moreno M., Ivanova N.V., Elías-Gutiérrez M., Pedersen S.L., Bessonov K., Hebert P.D.  
671 (2019). Using eDNA to biomonitor the fish community in a tropical oligotrophic lake. *PLoS One*, 14(4),  
672 e0215505.

673           Weigand H., Beermann A.J., Čiampor F., Costa F.O., Csabai Z., Duarte S., Strand M. (2019). DNA  
674 barcode reference libraries for the monitoring of aquatic biota in Europe: Gap-analysis and  
675 recommendations for future work. *Science of the Total Environment*, 678, 499-524.

676           Yu D.W., Ji Y., Emerson B.C., Wang X., Ye C., Yang C., Ding, Z. (2012). Biodiversity soup:  
677 metabarcoding of arthropods for rapid biodiversity assessment and biomonitoring. *Methods in Ecology and*  
678 *Evolution*, 3(4), 613-623.

679           Zhang S., Lu Q., Wang Y., Wang X., Zhao J., Yao M. (2020). Assessment of fish communities  
680 using environmental DNA: Effect of spatial sampling design in lentic systems of different sizes. *Molecular*  
681 *Ecology Resources*, 20(1), 242-255.

682           Zuanon J., Medonça F.P., Espírito Santo H., Dias M.S., Galuch A.V., Akama A. (2015). Guia de  
683 peixes da Reserva Adolpho Ducke.

684

685

686

687

688

689

690

691

692

693

694

695

696

697 **Figures**

698

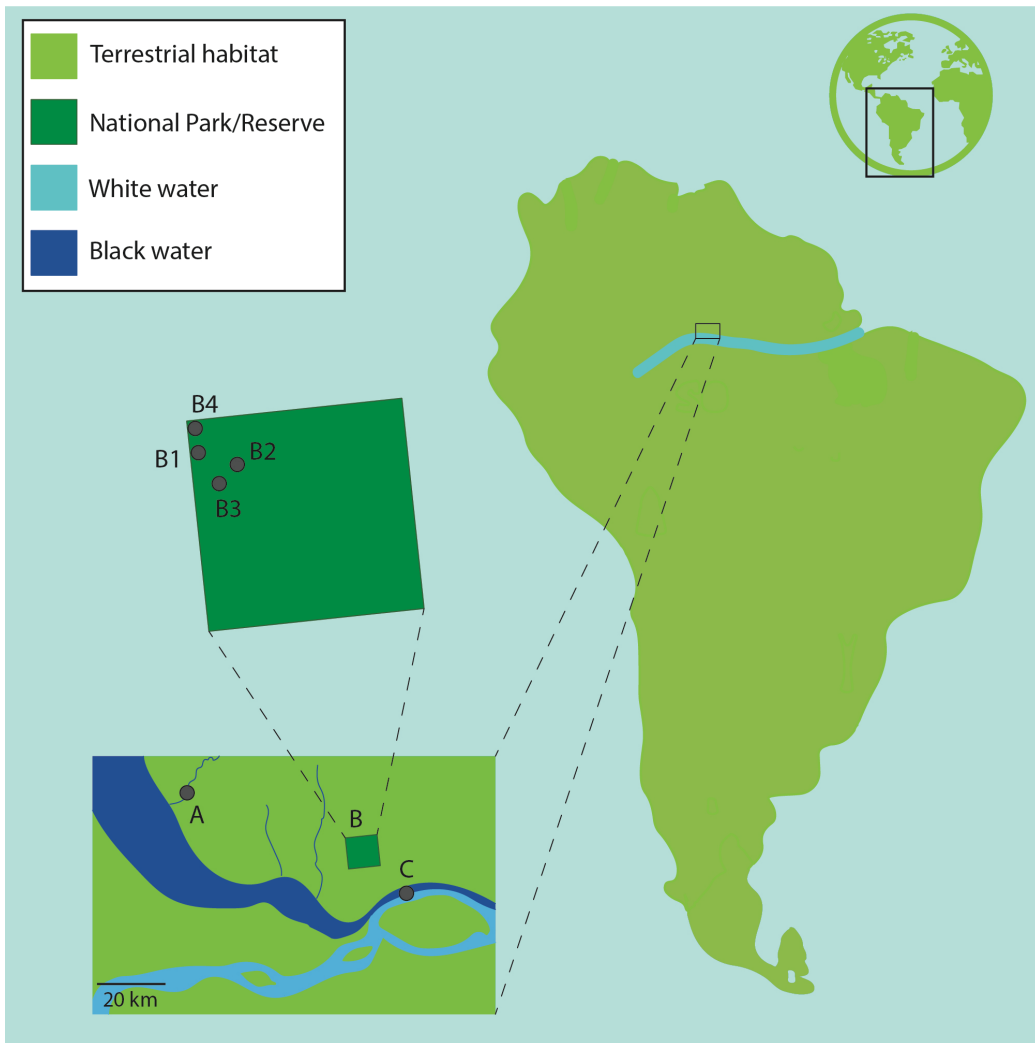

699

700

701 **Figure 1.** Sampling sites located in the Adolpho Ducke Forest Reserve (B1-B4), and the two  
702 additional sites located outside the Reserve (A: Aturiá stream, and C: confluence between the  
703 Solimões and Negro rivers - "*the meeting of the waters*").



A

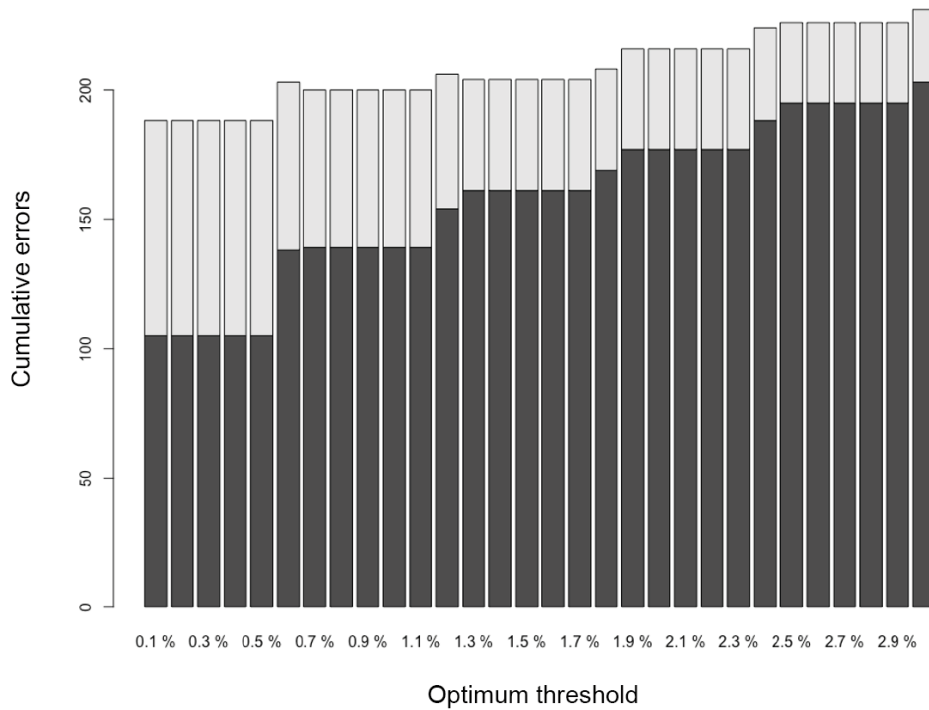

B

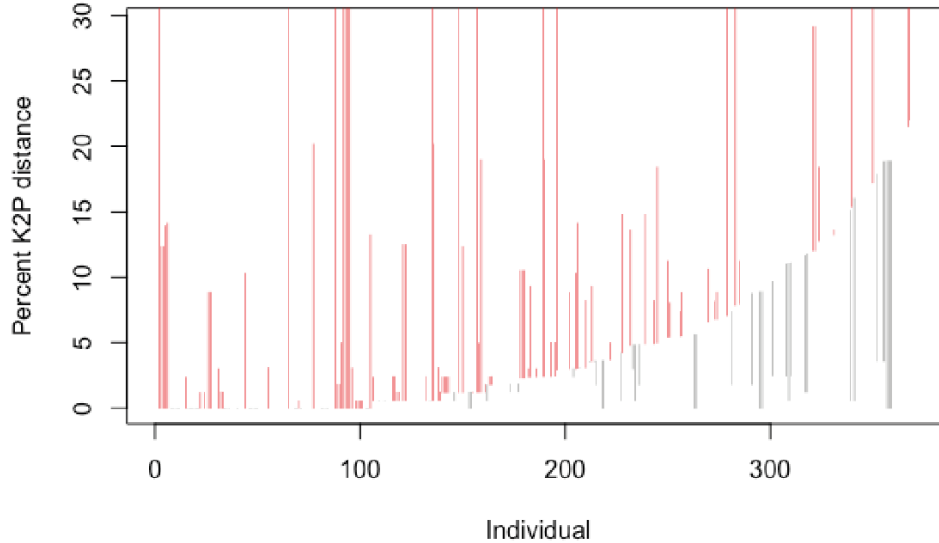

704

705 **Figure 2.** Optimum thresholds (A) and barcoding gap (B) analyses. Barplot (A) shows the false  
706 positive (light grey) and false negative (dark grey) rate of identification of species within the  
707 curated reference database at thresholds ranging from 0.1% to 3%. Line plot (B) of the barcode  
708 gap analyses for the 264 species (373 sequences) within the curated reference database. For each

709 individual in the dataset, the grey lines represent the furthest intraspecific distance (bottom of line  
710 value), and the closest interspecific distance (top of line value) (i.e., presence of a barcode gap).  
711 The red lines show where this relationship is reversed (i.e., no barcode gap).

712

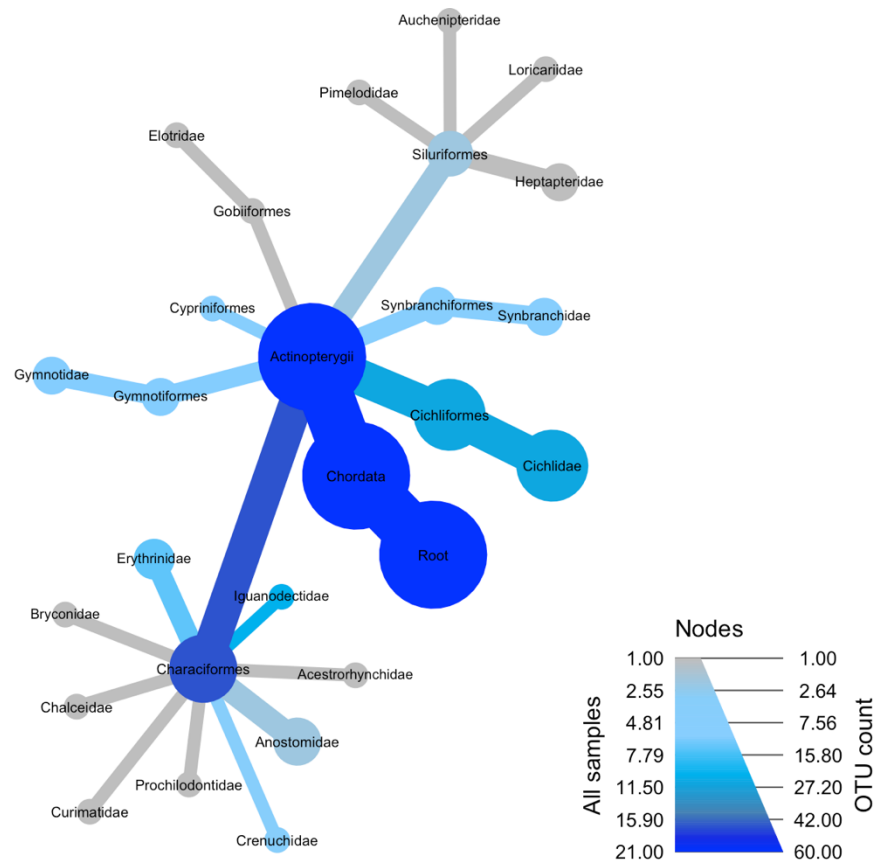

713

714 **Figure 3.** Heat tree displaying the fish diversity recovered for all sampling locations using eDNA  
715 metabarcoding. The blue colouration represents diversity identified from water samples, the darker  
716 the shade of blue, the more MOTUs detected for that taxonomic order.

717

718

719

720

721

722

723

724

725

726

727

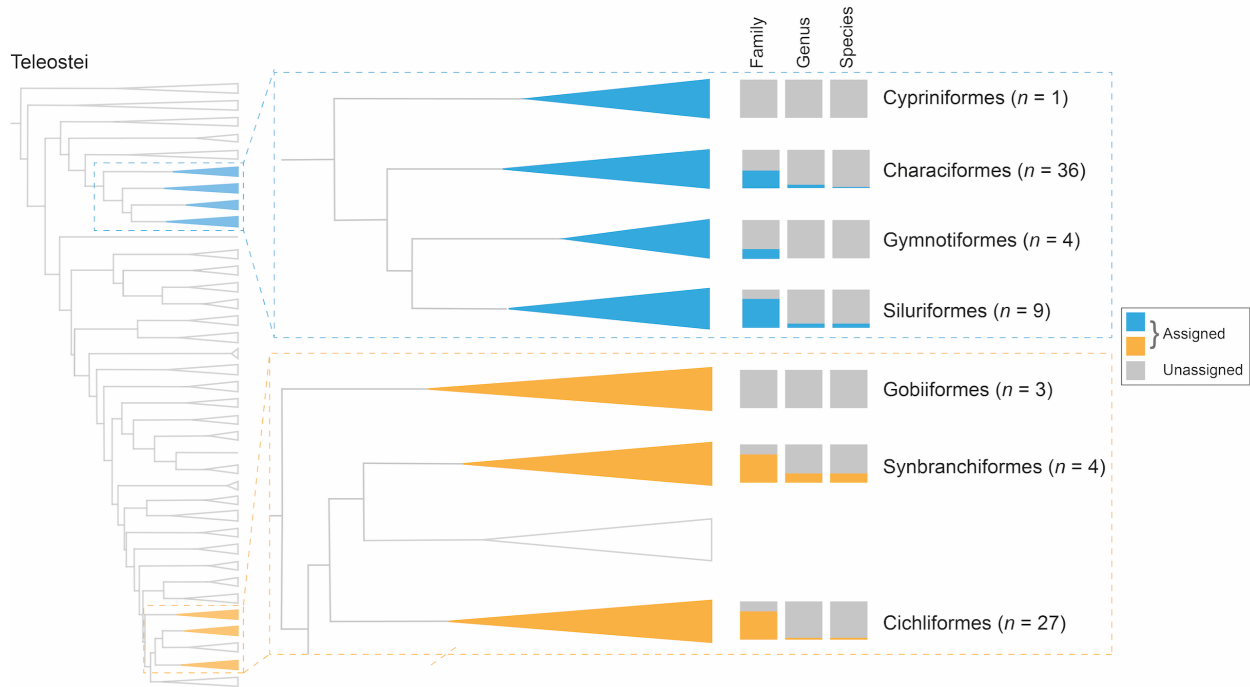

728

729 **Figure 4.** Represented orders within Teleostei (tree adapted from Betancur-R et al. 2017) to which

730 the number of identified Molecular Operational Taxonomic Units (MOTUs) obtained from

731 environmental DNA can be proportionally assigned to family, genus and species within each order.

732

733

734

735

736

737

738

739

740

741

742

743

744

745

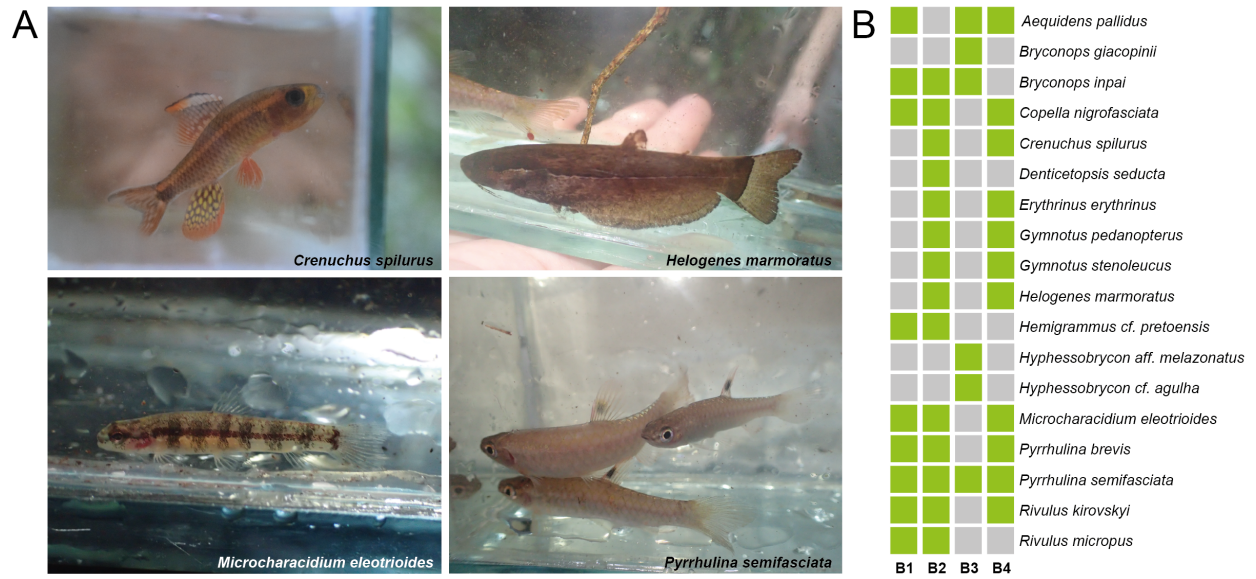

746

747 **Figure 5.** Examples of four species caught by netting in the Ducke Reserve (A), and presence  
 748 (green) and absence (grey) of each of the 18 species caught in the four streams (B1-B4) within the  
 749 Reserve (B).

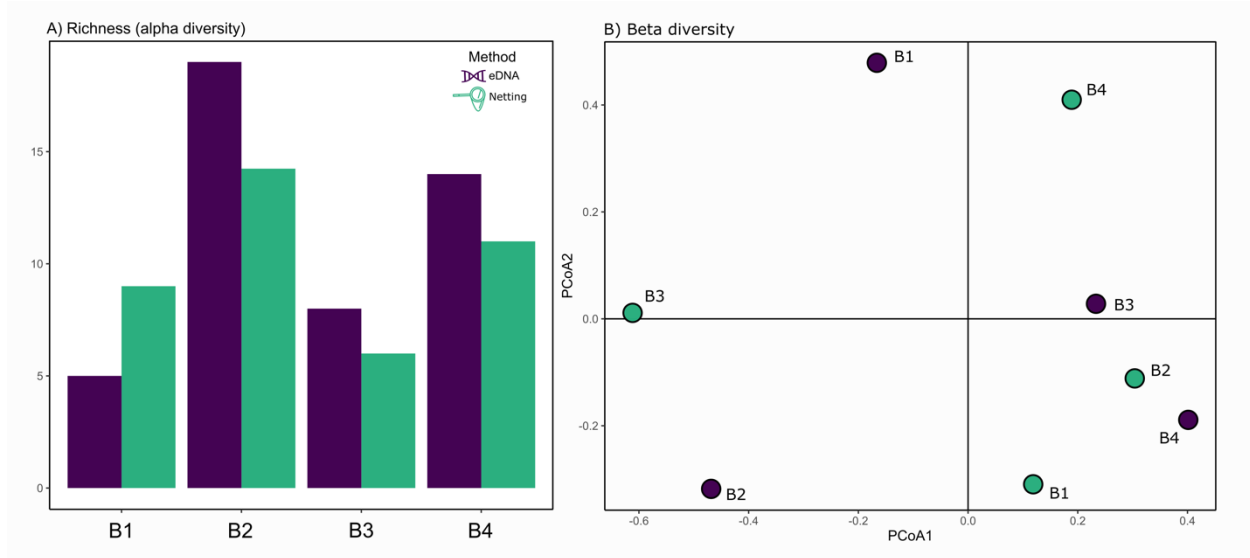

750

751 **Figure 6.** Species richness (A) and  $\beta$ -diversity inferred from separate PCoAs (B) based on eDNA  
752 MOTU data (purple) and netting data (green) from locations in the Ducke Reserve. See Fig. 1 for  
753 sampling locations.
